# Supplementary material for: Novel phenyl and thiophene dispiro indenoquinoxaline pyrrolidine quinolones induced apoptosis via G1/S and G2/M phase cell cycle arrest in MCF-7 cells
Source: Royal Society of Chemistry journal article supplement (doi:10.1039/d0nj02588g), 2020-01-01
Supplement: d0nj02588g1.pdf [file d0nj02588g1.pdf]

## A Novel Phenyl and Thiophene Dispiro Indenoquinoxaline Pyrrolidine Quinolones Induced Apoptosis via G1/S and G2/M Phase Cell Cycle Arrest in MCF-7 Cells

Selvaraj Shyamsivappan<sup>a</sup>, Arjunan Saravanan<sup>b</sup>, Raju Vivek<sup>c</sup>, Thangaraj Suresh<sup>a</sup>, Ramasamy Shankar<sup>d</sup> Kodiveri Muthukaliannan Gothandam<sup>e</sup> Palathurai Subramaniam Mohan<sup>a,\*</sup>

<sup>a</sup>School of Chemical Sciences, Bharathiar University, Coimbatore, Tamil Nadu, India.

<sup>b</sup>DRDO-BU CLS, Bharathiar University campus, Coimbatore, Tamil Nadu, India.

<sup>c</sup>Cancer Research Program (CRP), Bio-Nano Therapeutics Research Laboratory, School of Life Sciences, Department of Zoology, Bharathiar University, Coimbatore, Tamil Nadu, India.

<sup>d</sup>Department of Physics, Bharathiar University, Coimbatore, Tamil Nadu, India.

<sup>e</sup>School of Bio-Sciences and Technology, Vellore Institute of Technology, Vellore, 632014, Tamil Nadu, India

### Spectral data

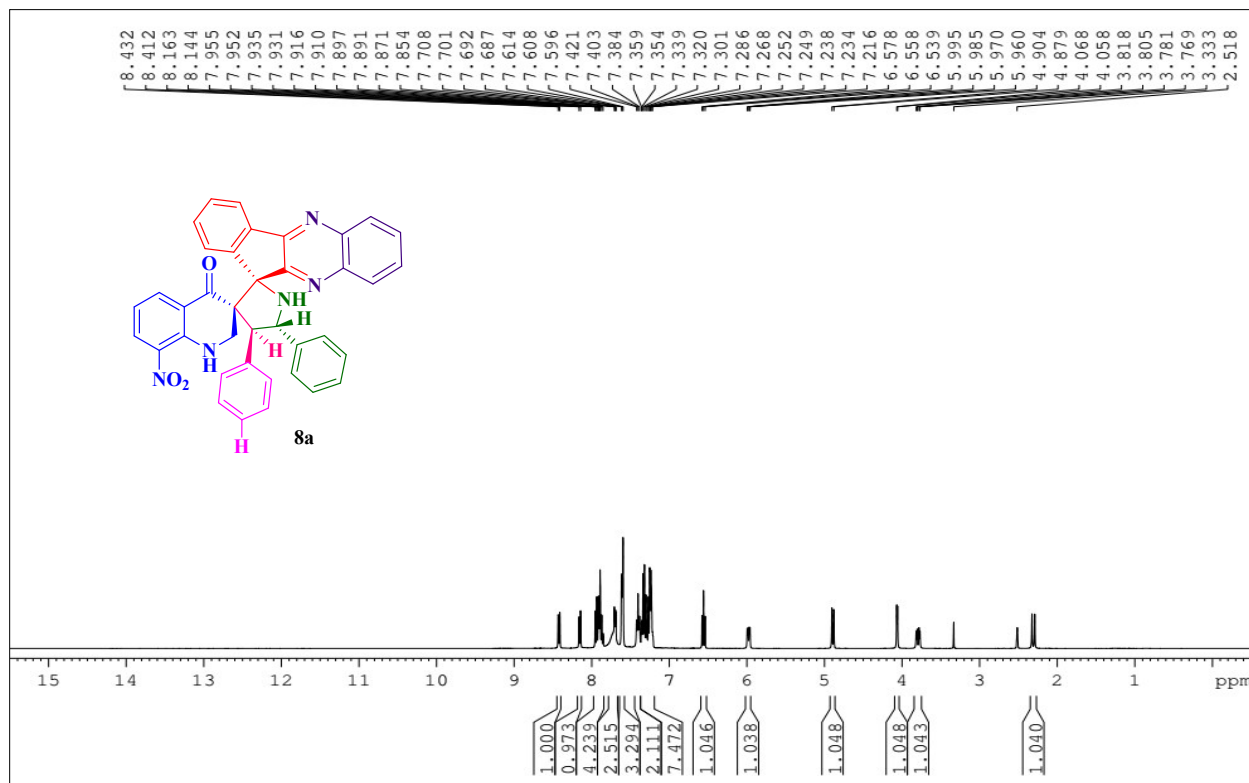

Figure S1. <sup>1</sup>H NMR spectrum of compound 8a

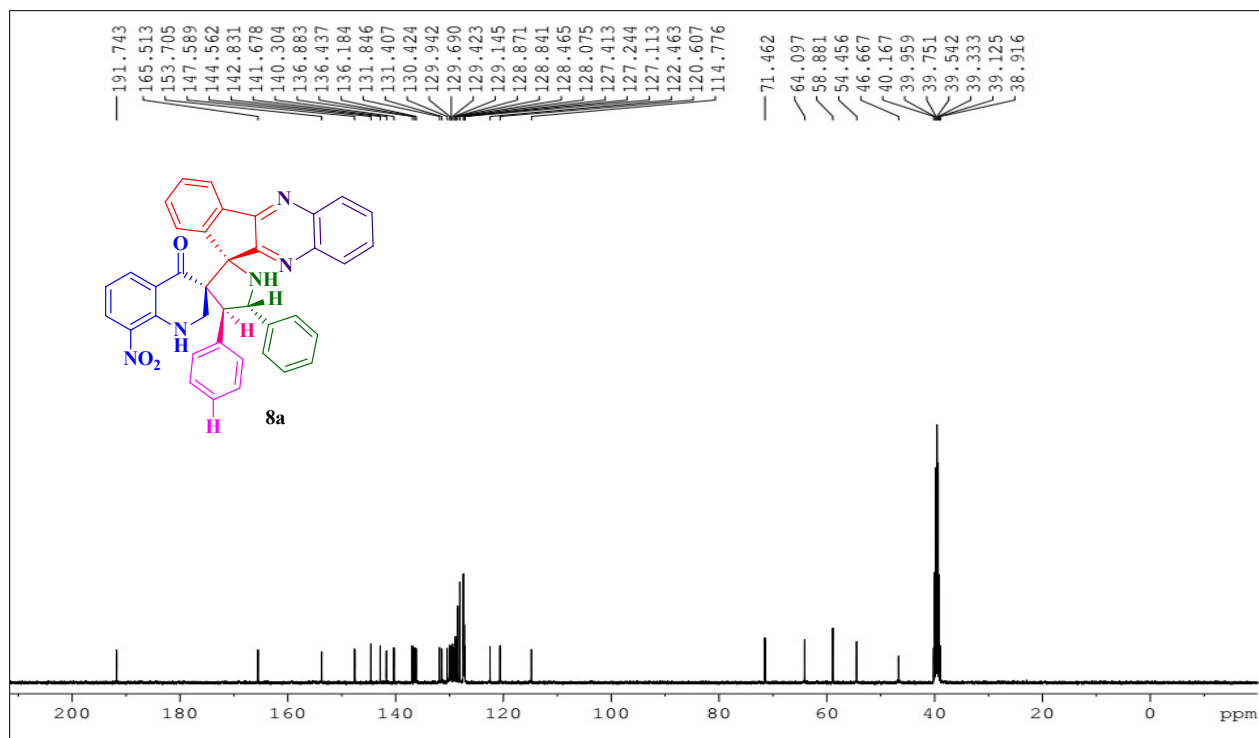

**Figure S2.  $^{13}\text{C}$  NMR spectrum of compound 8a**

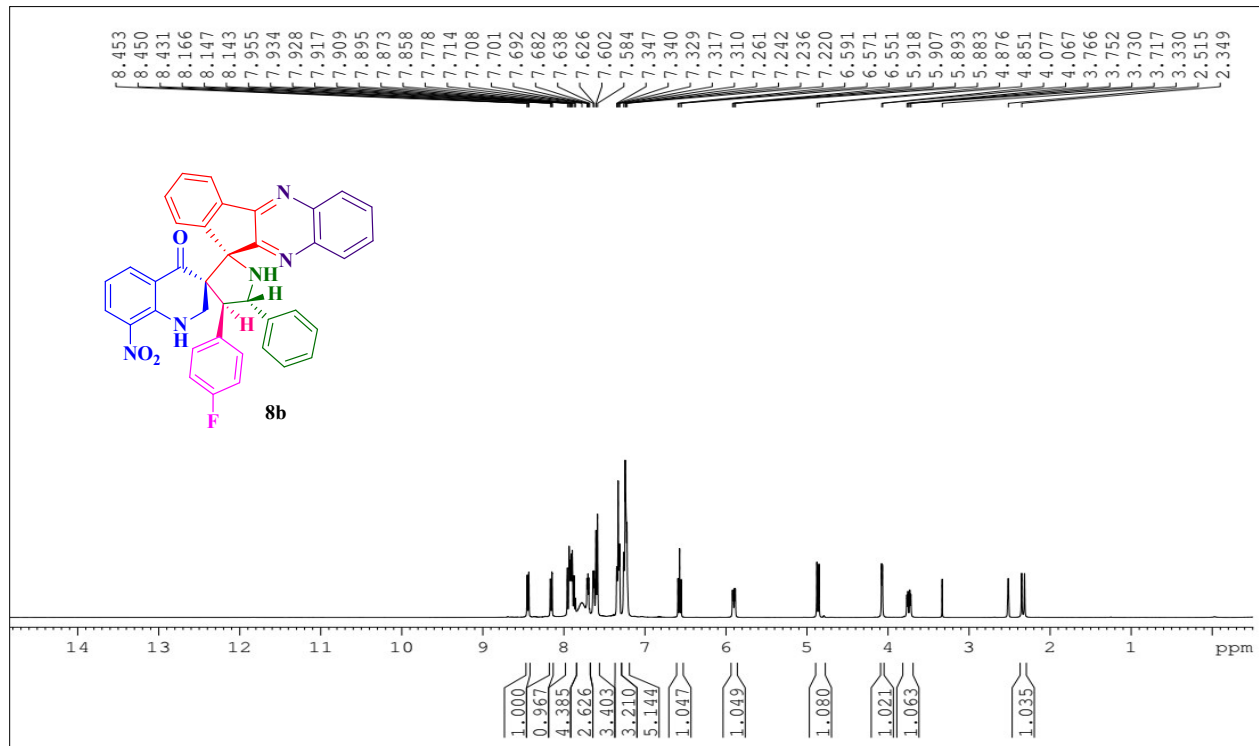

**Figure S3.  $^1\text{H}$  NMR spectrum of compound 8b**

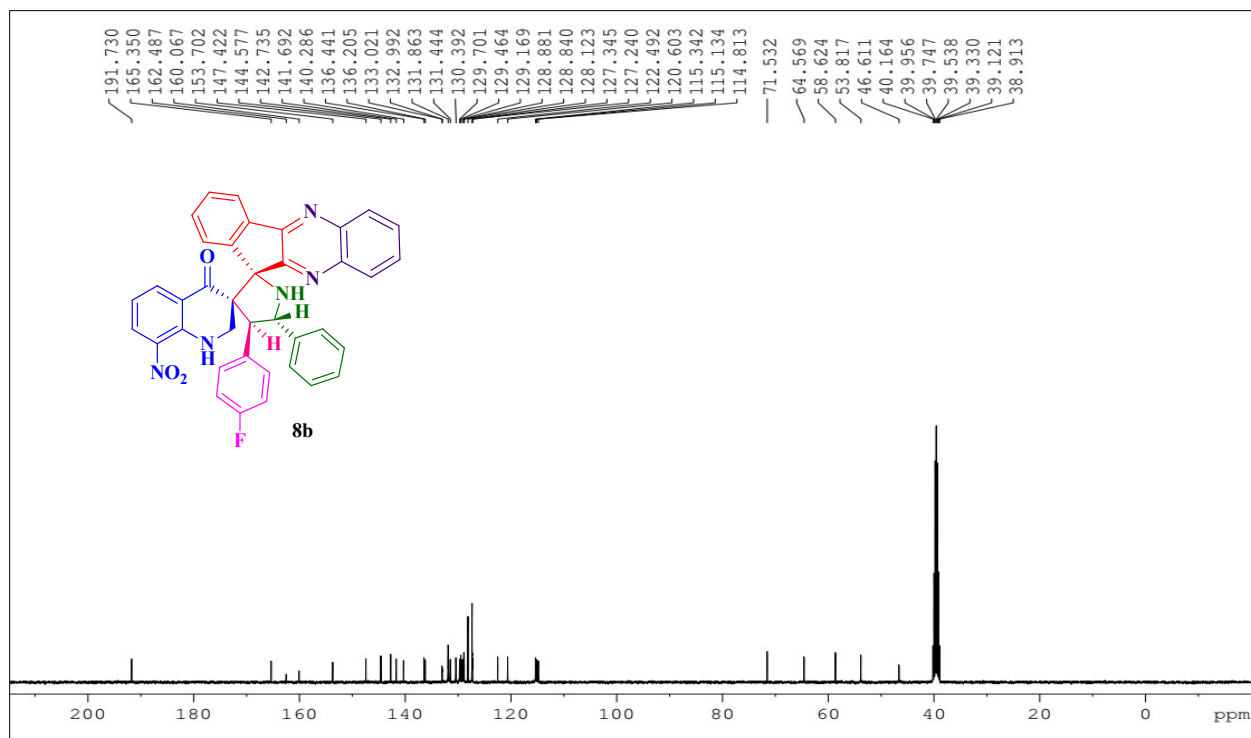

Figure S4. <sup>13</sup>C NMR spectrum of compound 8b

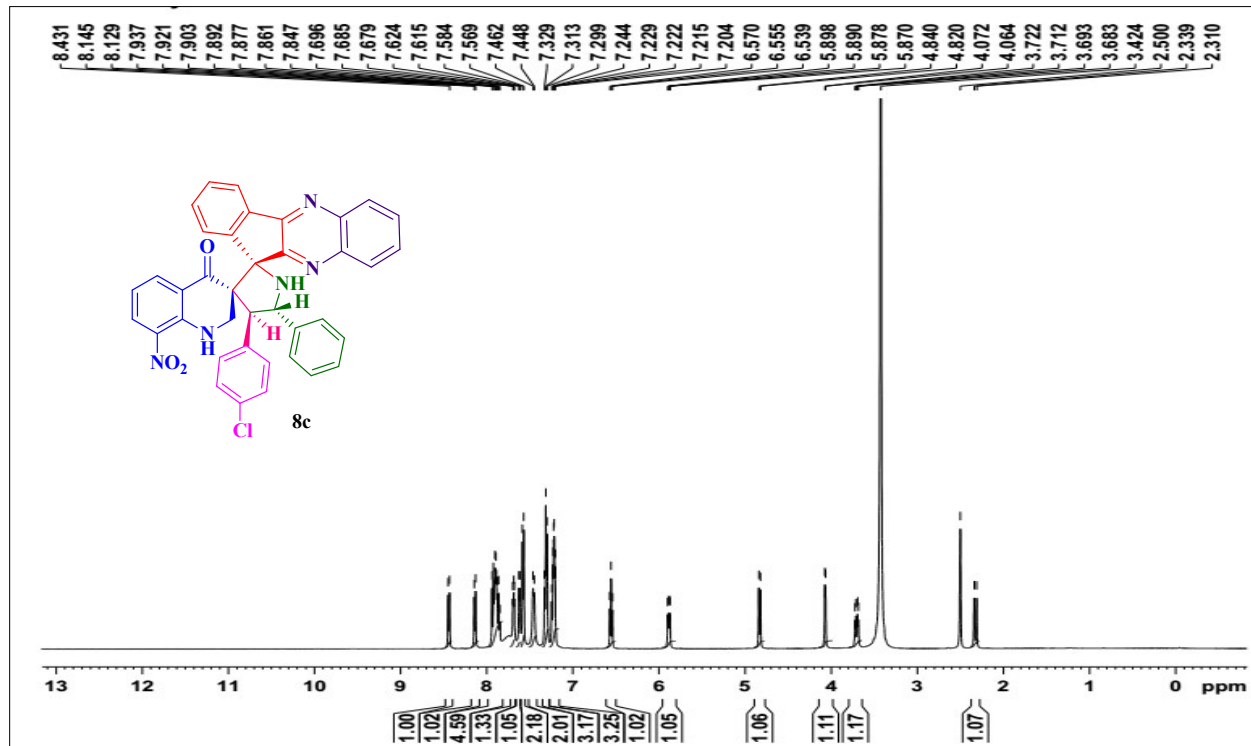

Figure S5. <sup>1</sup>H NMR spectrum of compound 8c

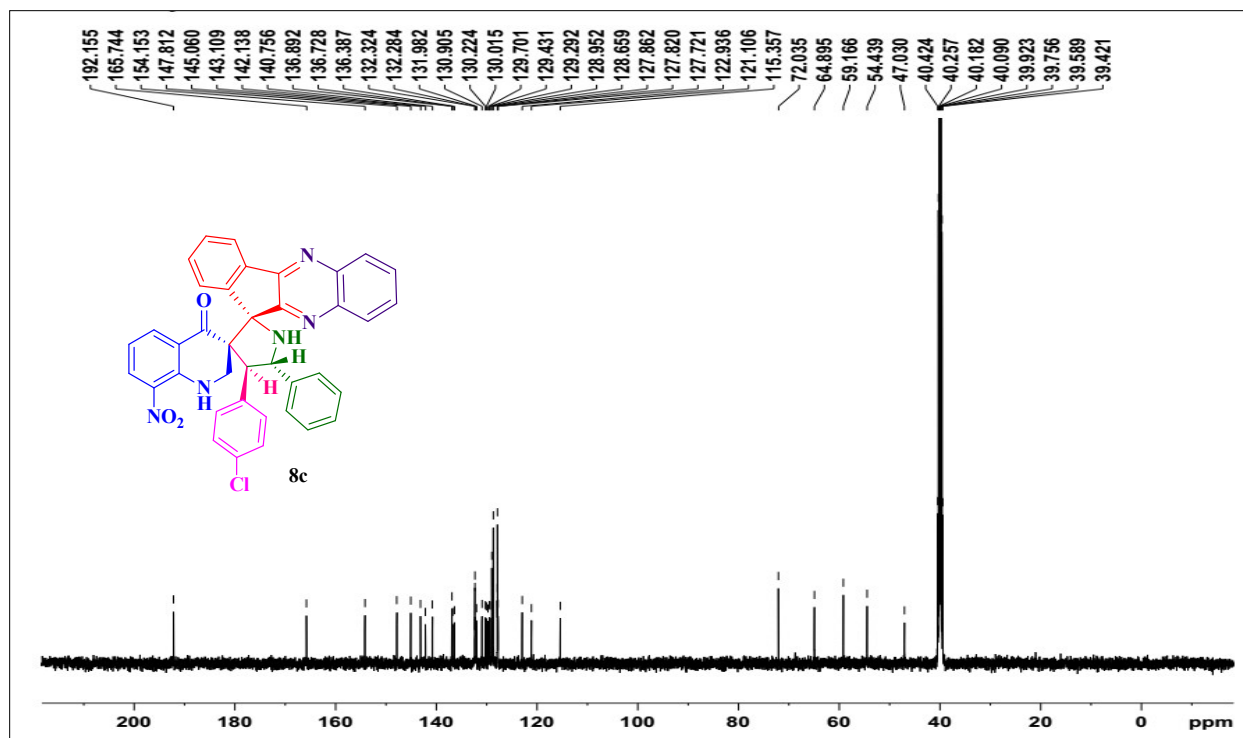

**Figure S6.  $^{13}\text{C}$  NMR spectrum of compound 8c**

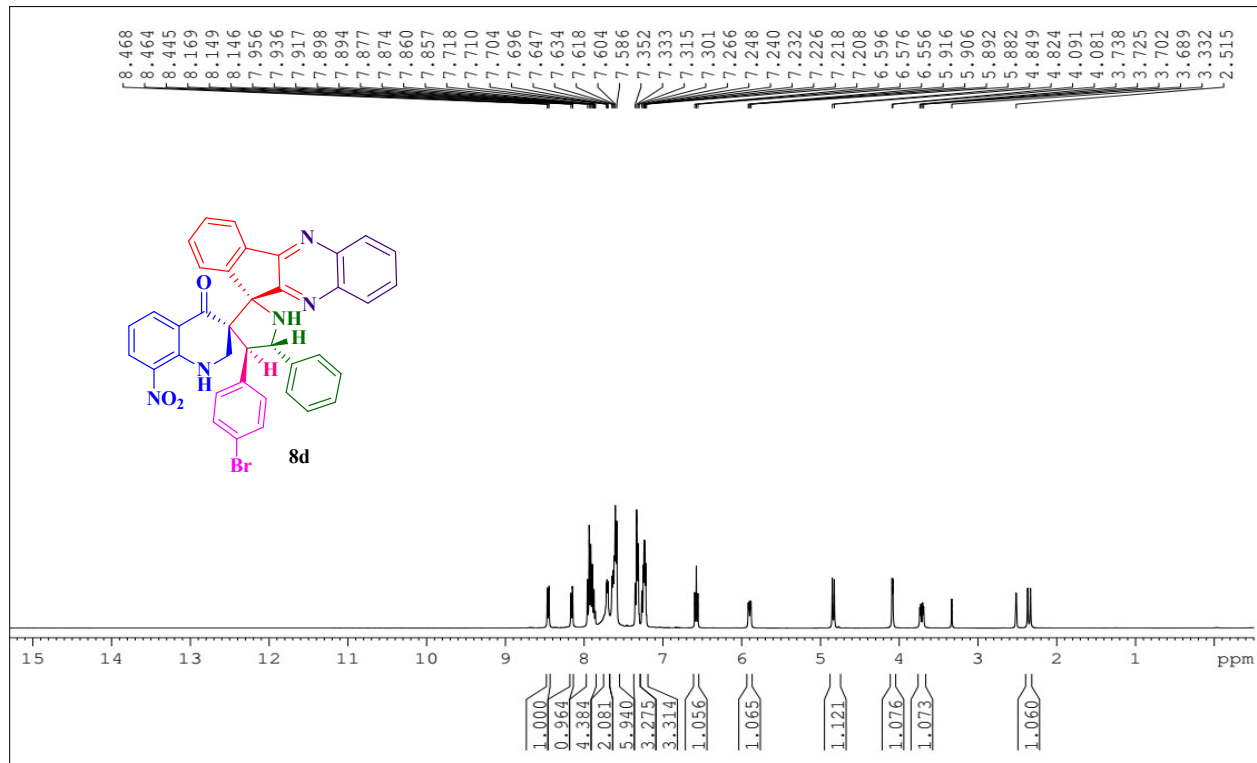

**Figure S7.  $^1\text{H}$  NMR spectrum of compound 8d**

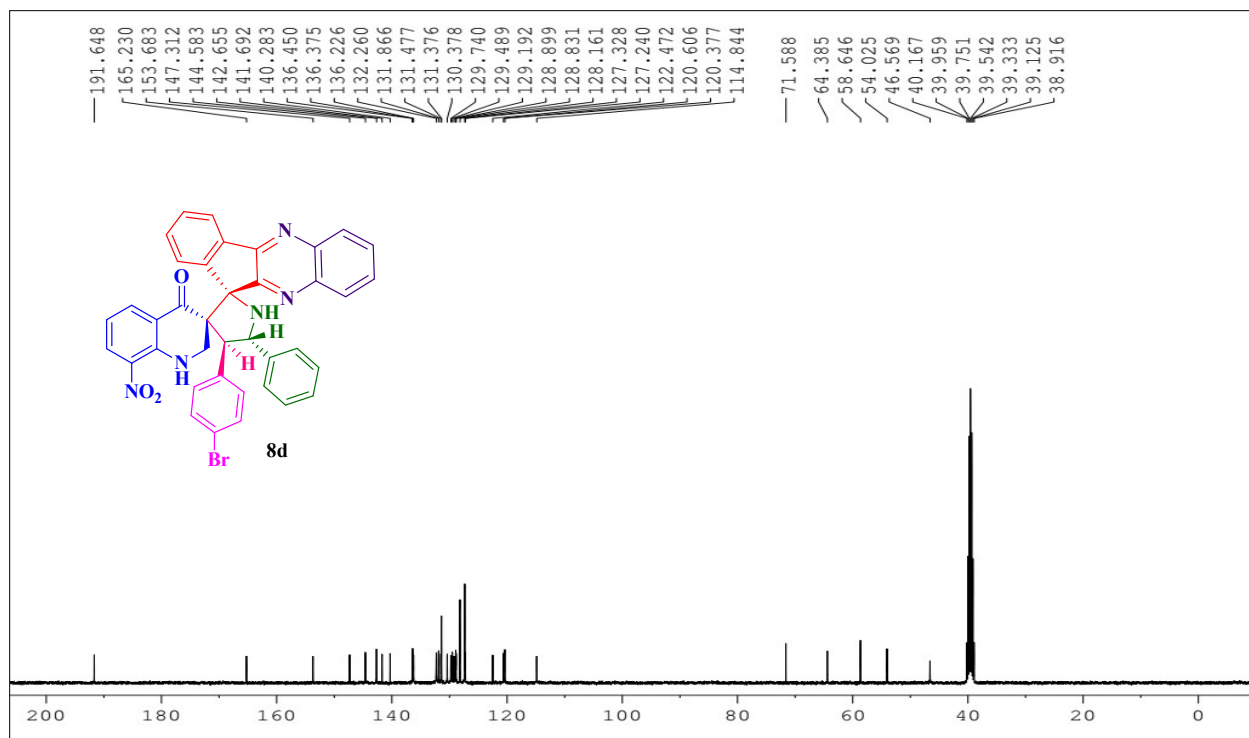

**Figure S8. <sup>13</sup>C NMR spectrum of compound 8d**

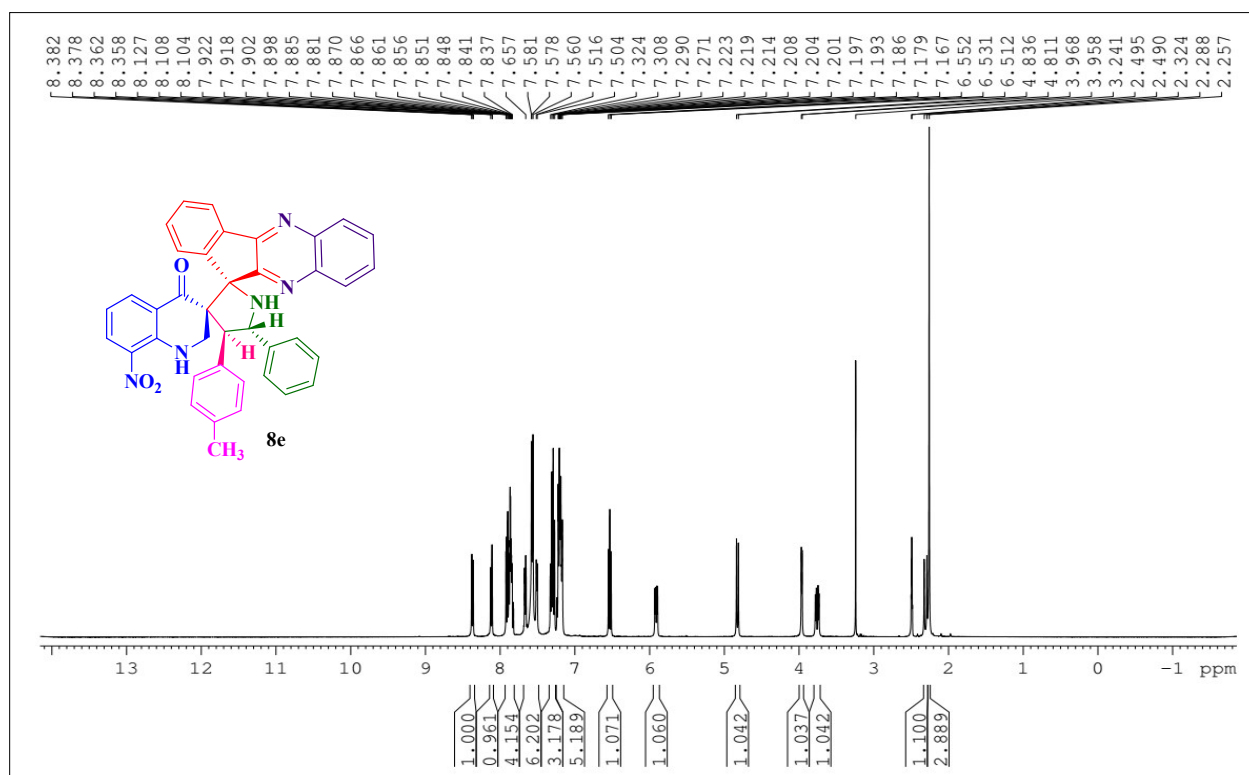

**Figure S9. <sup>1</sup>H NMR spectrum of compound 8e**

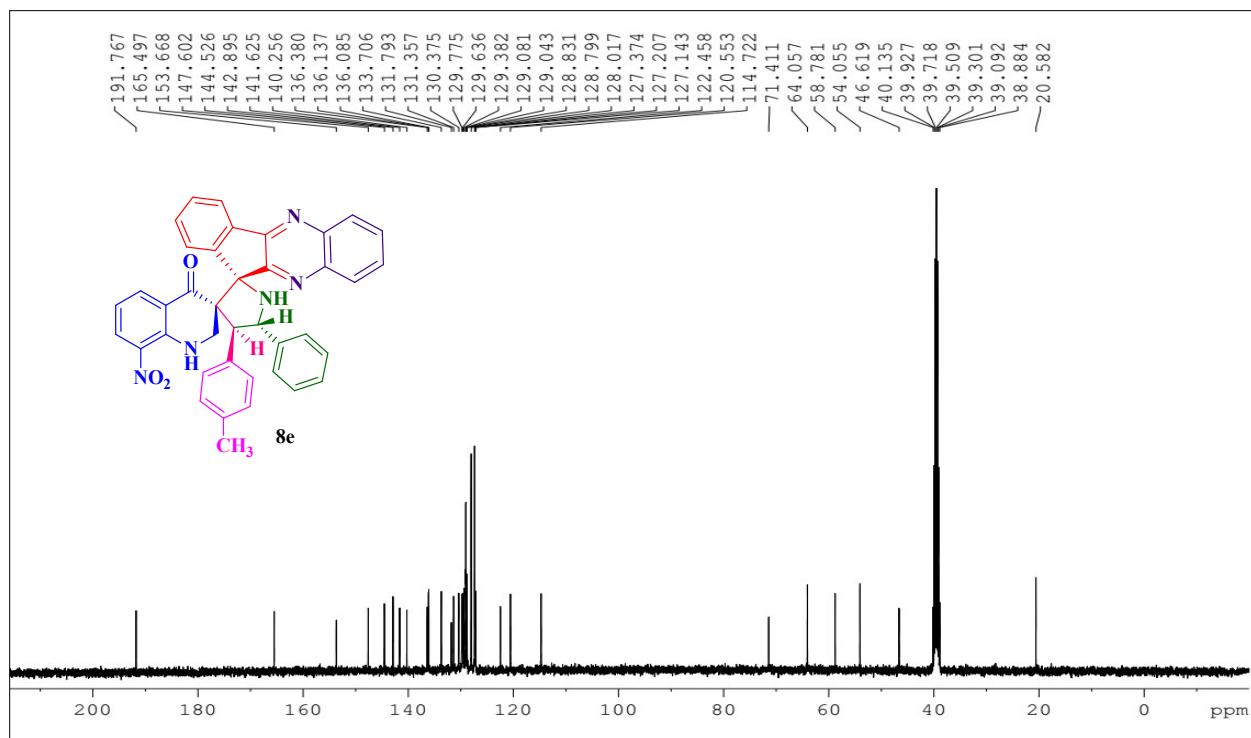

Figure S10. <sup>13</sup>C NMR spectrum of compound 8e

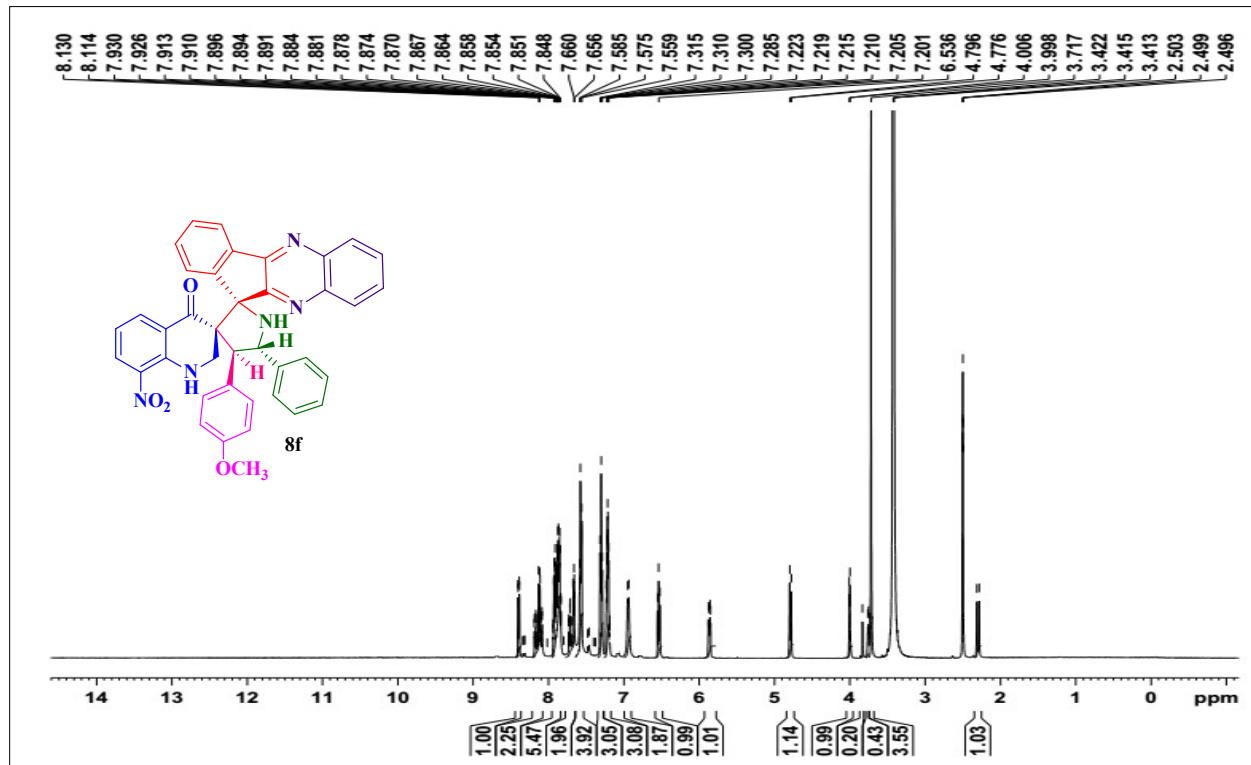

Figure S11. <sup>1</sup>H NMR spectrum of compound 8f

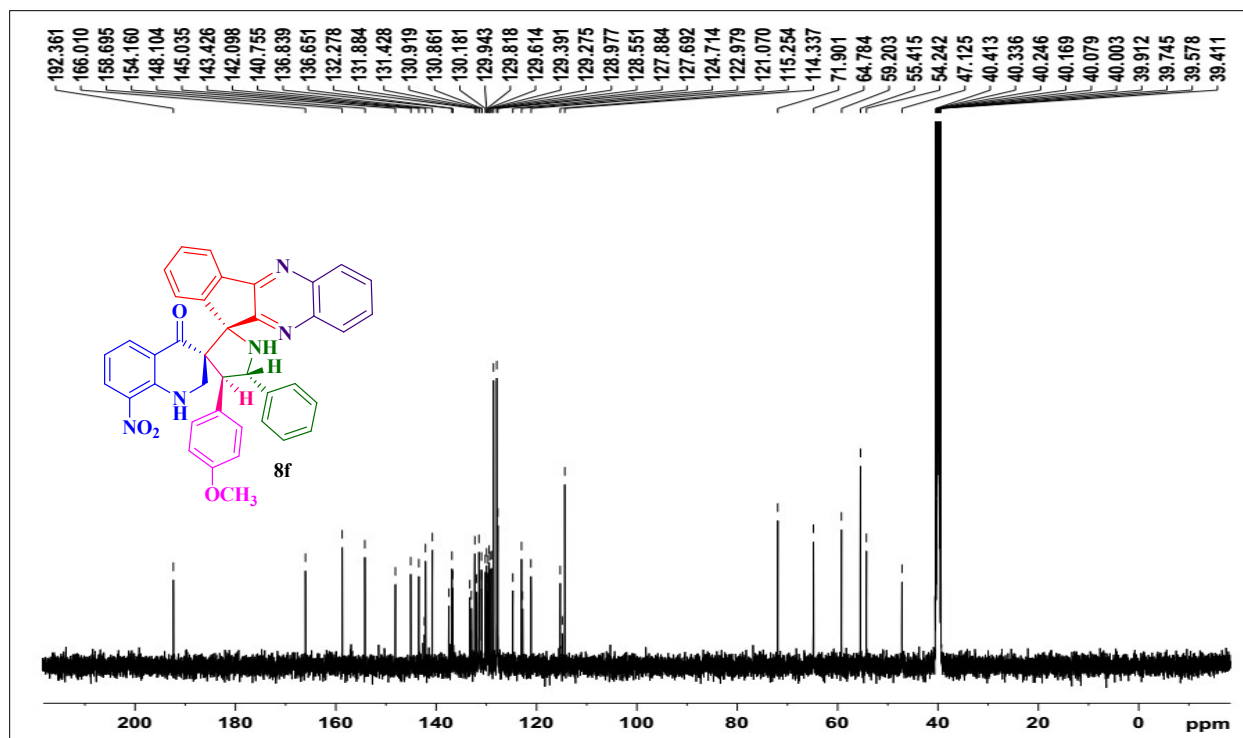

Figure S12.  $^{13}\text{C}$  NMR spectrum of compound 8f

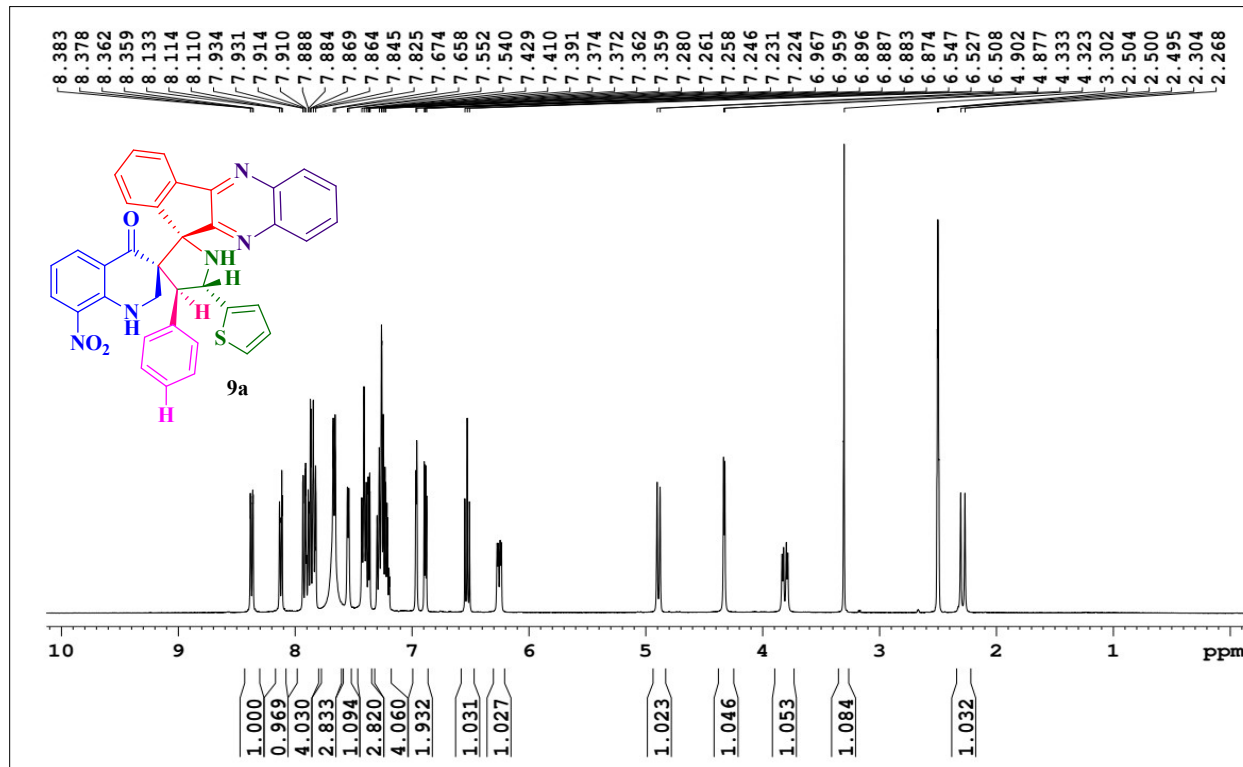

Figure S13.  $^1\text{H}$  NMR spectrum of compound 9a

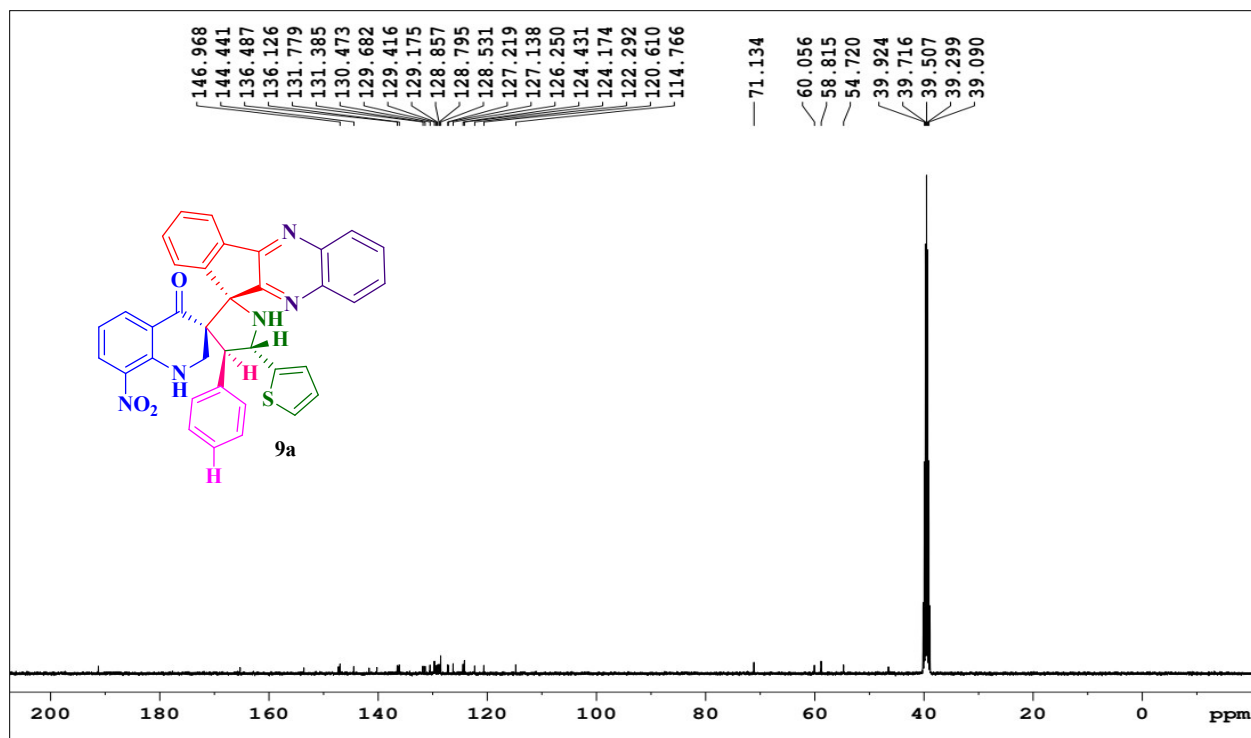

Figure S14. <sup>13</sup>C NMR spectrum of compound 9a

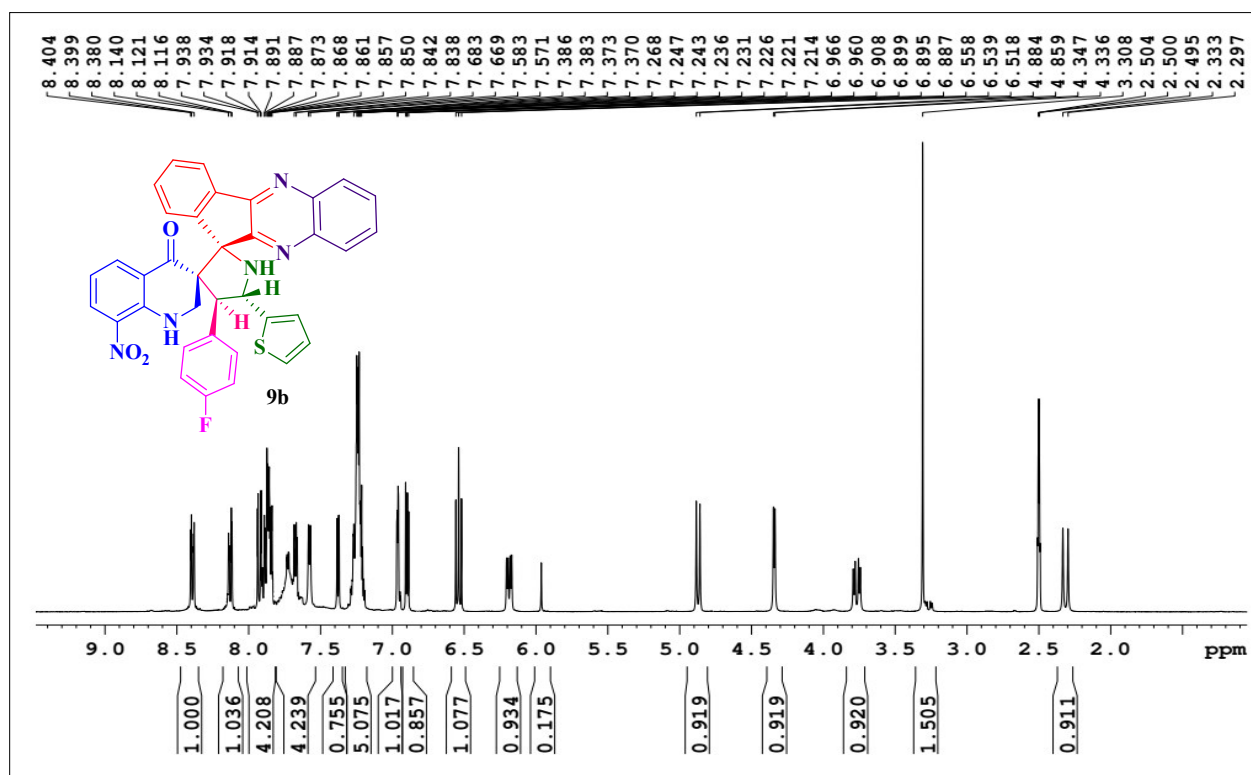

Figure S15. <sup>1</sup>H NMR spectrum of compound 9b



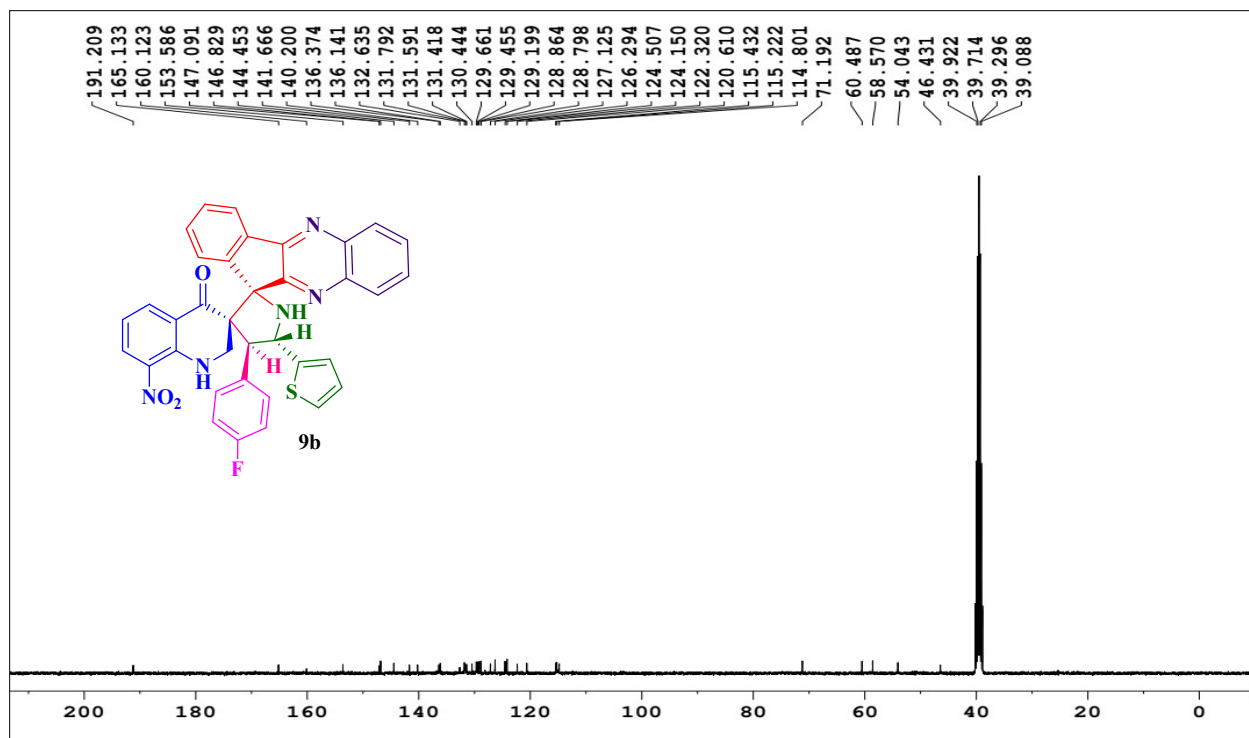

Figure S16. <sup>13</sup>C NMR spectrum of compound 9b

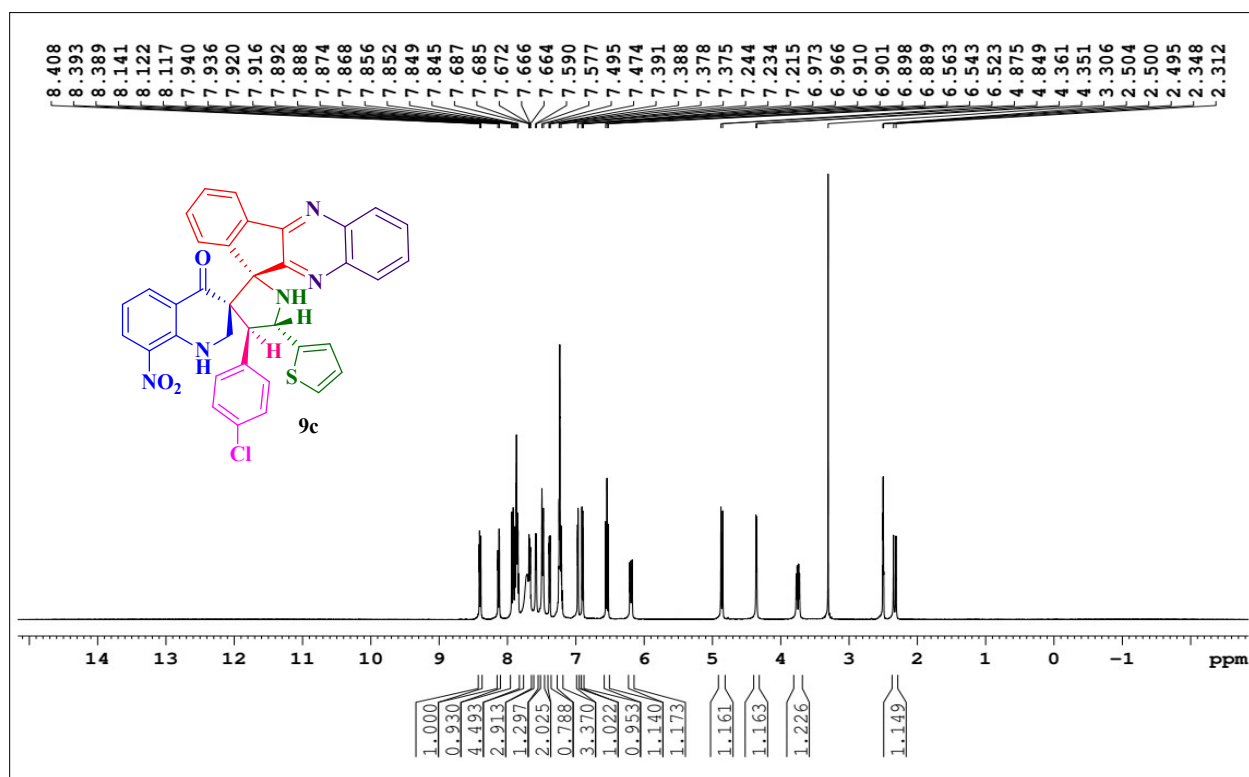

Figure S17. <sup>1</sup>H NMR spectrum of compound 9c

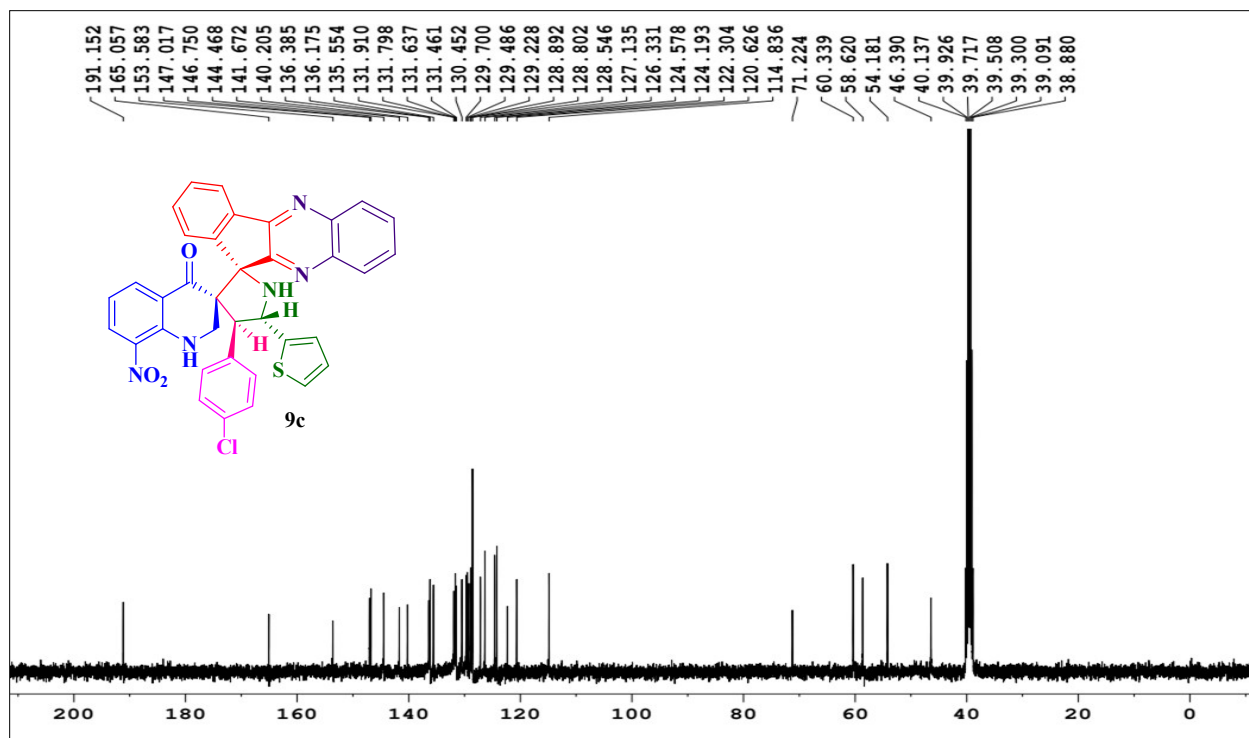

Figure 18. <sup>13</sup>C NMR spectrum of compound 9c

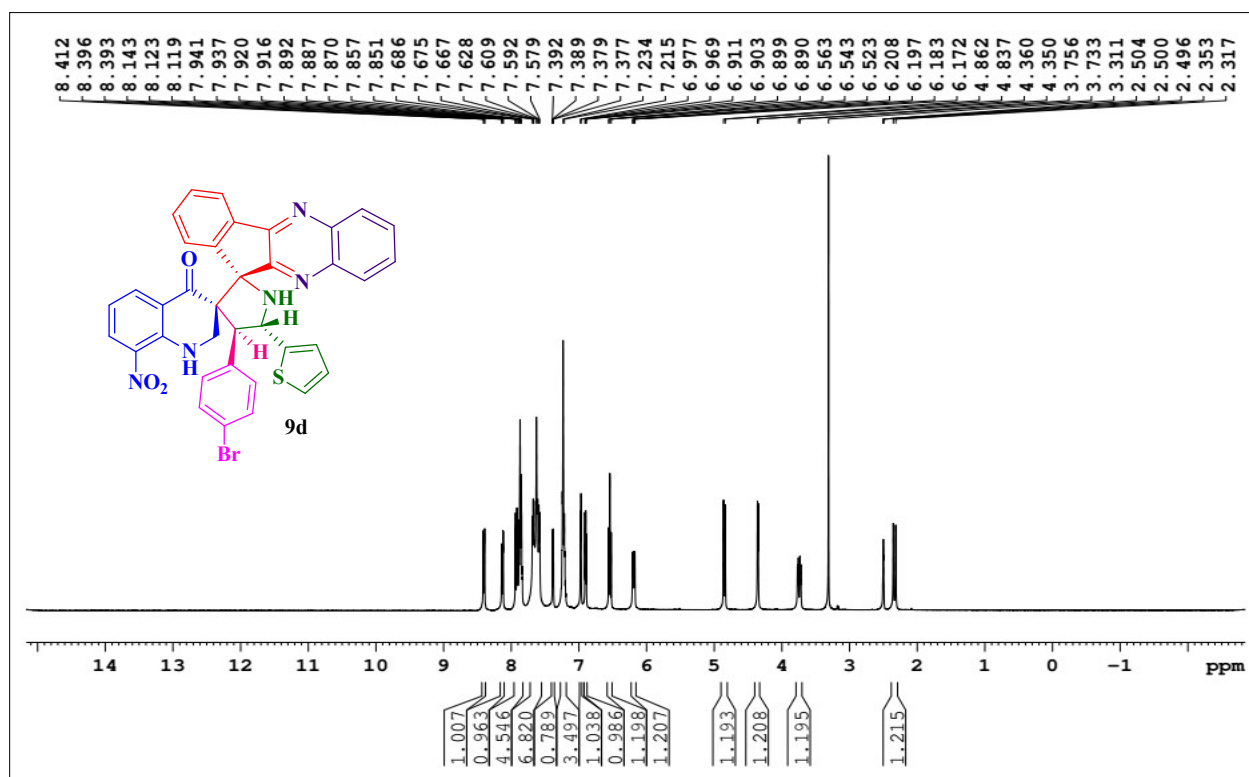

Figure 19. <sup>1</sup>H NMR spectrum of compound 9d

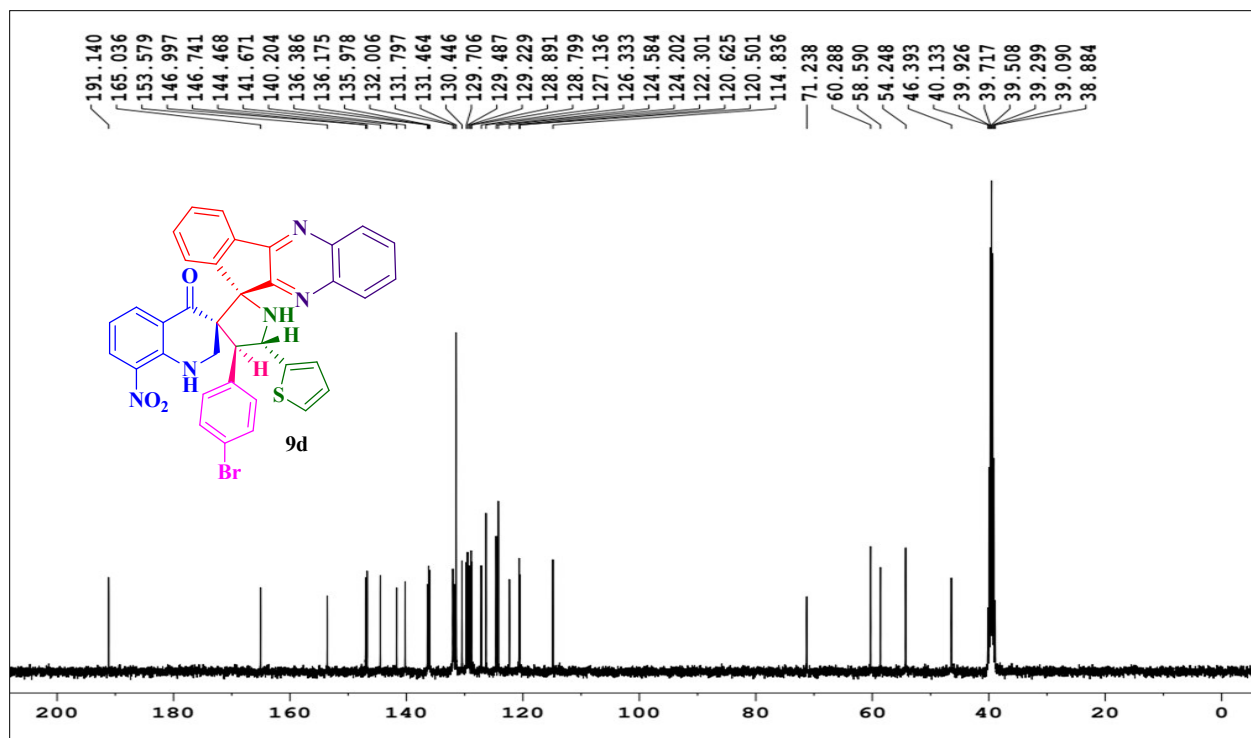

Figure 20.  $^{13}\text{C}$  NMR spectrum of compound 9d

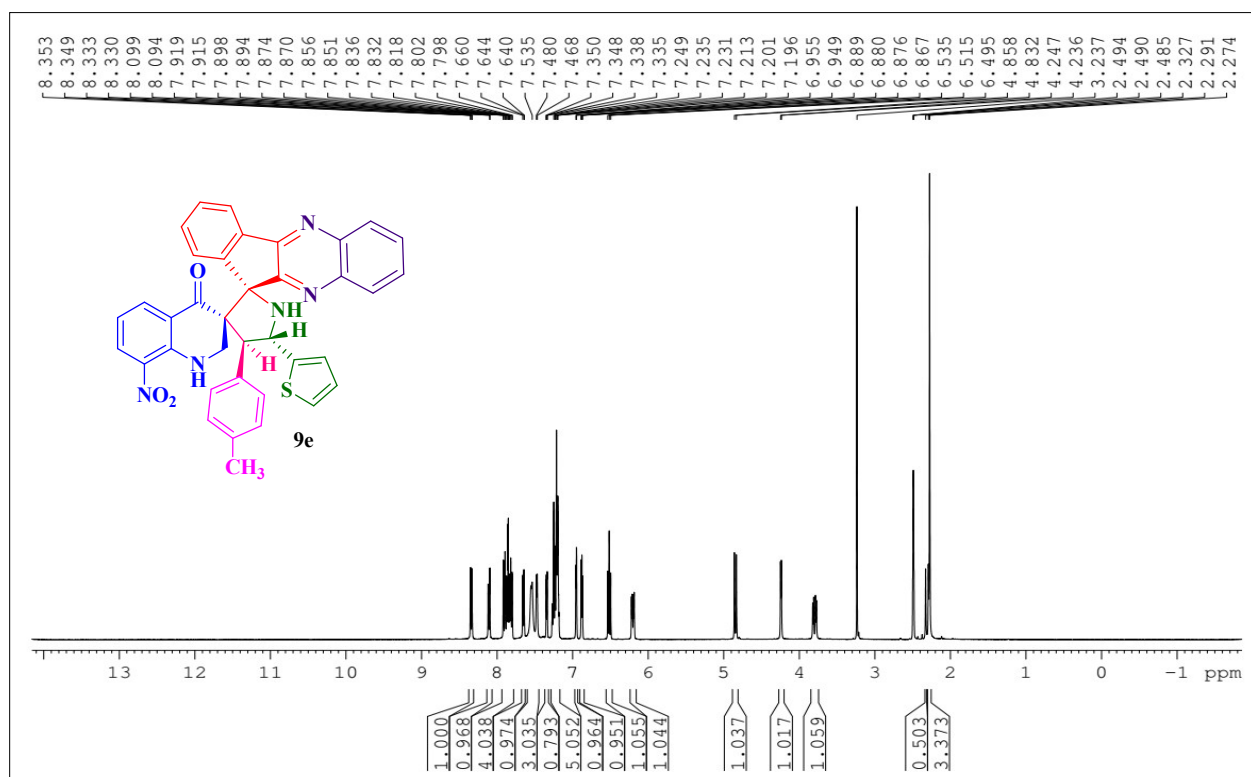

Figure 21.  $^1\text{H}$  NMR spectrum of compound 9e

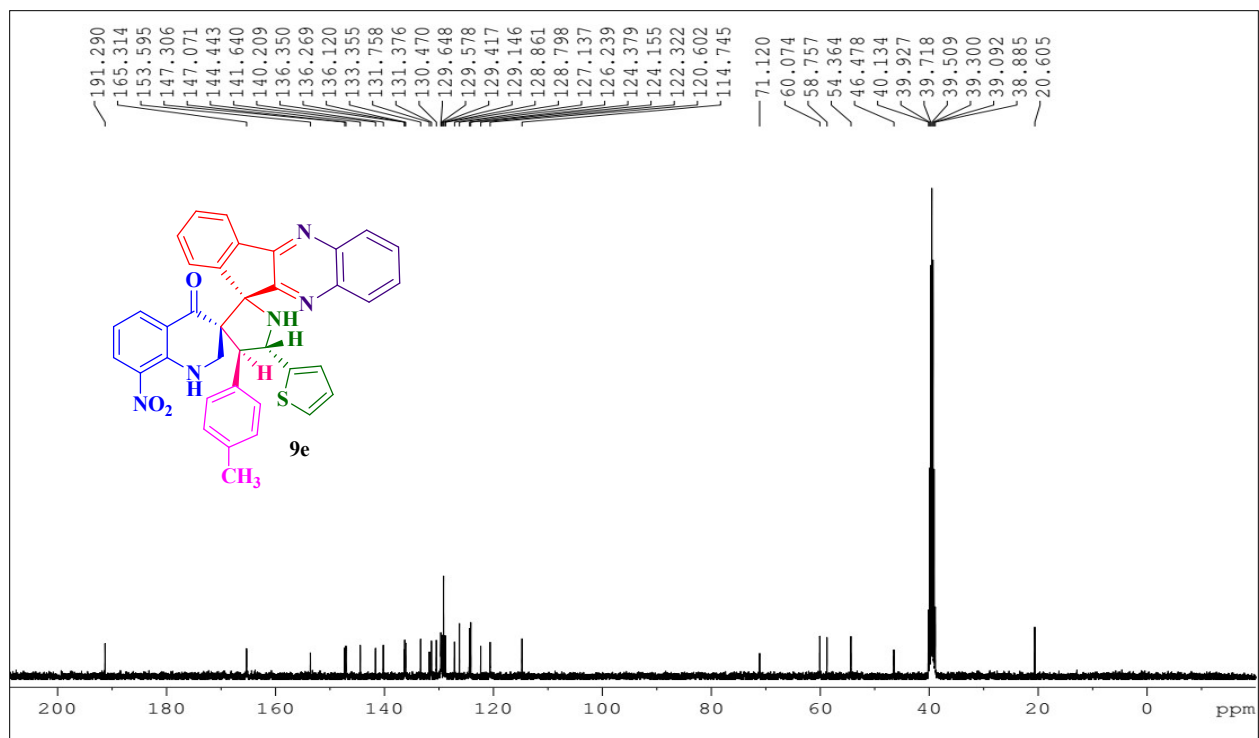

Figure 22. <sup>13</sup>C NMR spectrum of compound 9e

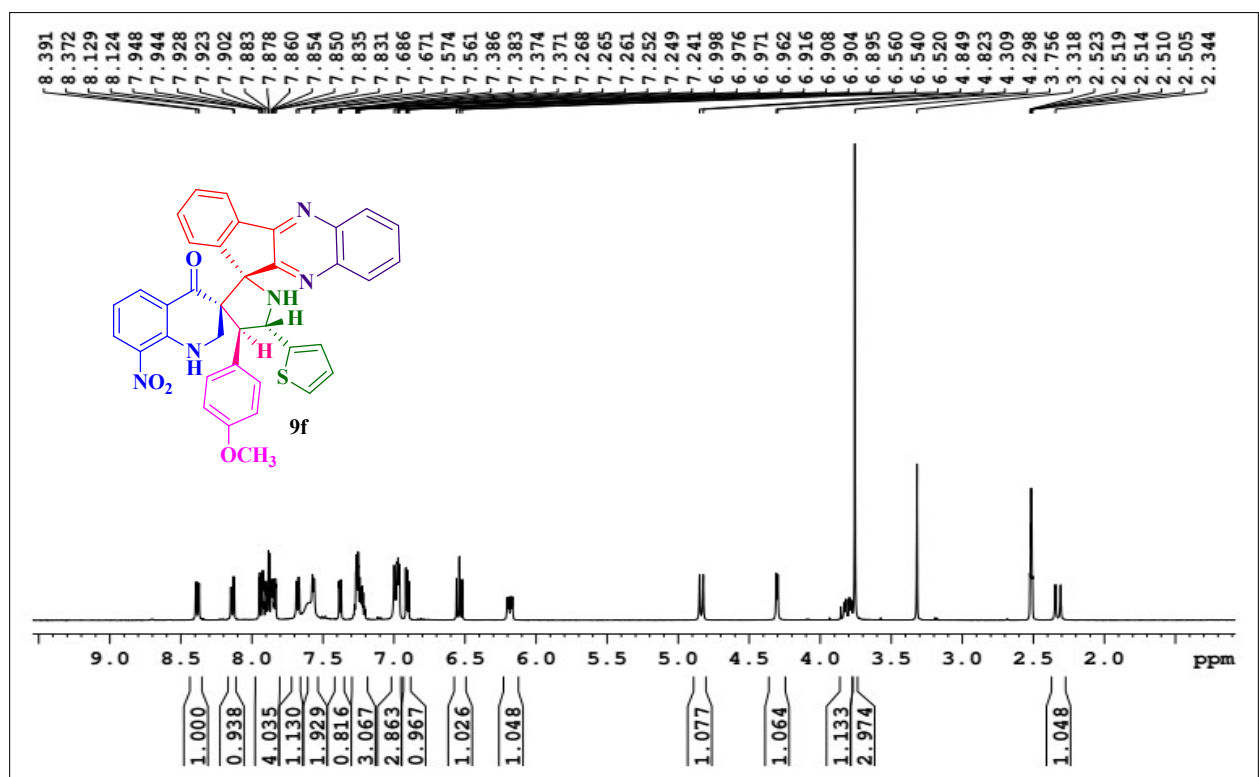

Figure 23. <sup>1</sup>H NMR spectrum of compound 9f

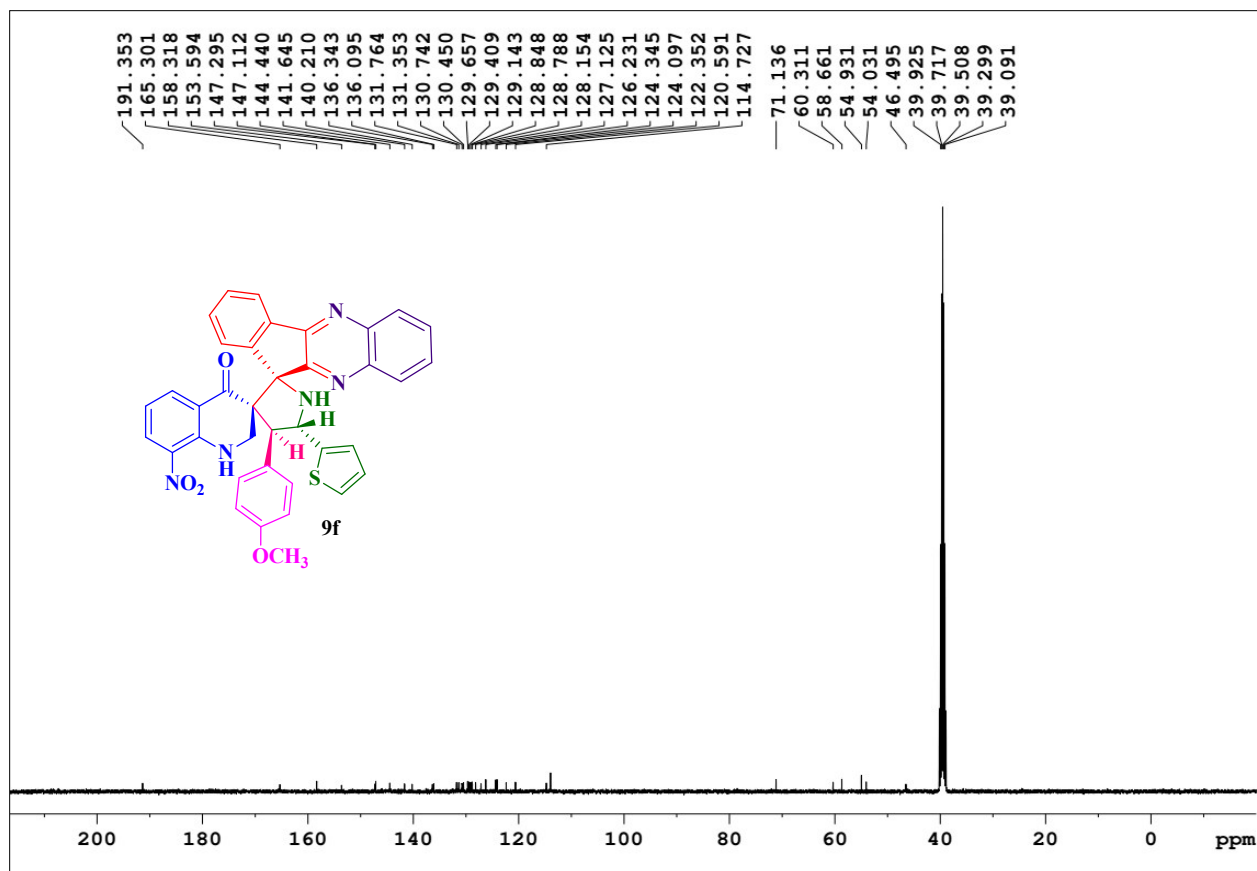

Figure 24. <sup>13</sup>C NMR spectrum of compound 9f

Table S1 Crystallographic details of the compound 9f

|                      |                                                                                      |
|----------------------|--------------------------------------------------------------------------------------|
| Empirical formula    | C <sub>37</sub> H <sub>27</sub> N <sub>5</sub> O <sub>4</sub> S                      |
| Formula weight       | 637.69                                                                               |
| Temperature          | 293(2) K                                                                             |
| Wavelength           | 0.71073 Å                                                                            |
| Crystal system       | Monoclinic                                                                           |
| Space group          | P 2 <sub>1</sub> /c                                                                  |
| Unit cell dimensions | a = 13.472(3) Å; α = 90<br>b = 16.568(3) Å; β = 93.40(3)°<br>c = 13.524(3) Å; γ = 90 |
| Volume               | 3013.5(11) Å <sup>3</sup>                                                            |
| Z                    | 4                                                                                    |

|                                    |                                             |
|------------------------------------|---------------------------------------------|
| Density (calculated)               | 1.406 Mg/m <sup>3</sup>                     |
| Absorption coefficient             | 0.160 mm <sup>-1</sup>                      |
| F(000)                             | 1328                                        |
| Crystal size                       | 0.22 × 0.18 × 0.14 mm <sup>3</sup>          |
| Theta range for data collection    | 2.410 to 23.933°.                           |
| Index ranges                       | -14 ≤ h ≤ 14, -17 ≤ k ≤ 17, -14 ≤ l ≤ 14    |
| Reflections collected              | 23334                                       |
| Independent reflections            | 3888 [R(int) = 0.0241]                      |
| Completeness to theta =<br>25.242° | 71.40%                                      |
| Refinement method                  | Full-matrix least-squares on F <sup>2</sup> |
| Data / restraints / parameters     | 3888 / 3 / 443                              |
| Goodness-of-fit on F <sup>2</sup>  | 1.045                                       |
| Final R indices [I > 2σ(I)]        | R1 = 0.0349, wR2 = 0.0888                   |
| R indices (all data)               | R1 = 0.0396, wR2 = 0.0948                   |
| Largest diff. peak and hole        | 0.184 and -0.291 e.Å <sup>-3</sup>          |

---
